# Supplementary material for: CSP and Takeout Genes Modulate the Switch between Attraction and Repulsion during Behavioral Phase Change in the Migratory Locust
Source: PLOS journal article supplement (doi:10.1371/journal.pgen.1001291), 2011-02-03
Supplement: S17 (10.1371/journal.pgen.1001291.s017) [file journal.pgen.1001291.s017]

Table S1. Number of differentially expressed genes during the time

course of IG or CS

|  |  | P < 0.05 | **P < 0.005** | P < 0.001 |
| --- | --- | --- | --- | --- |
| IG | Time course | 810 | **794** | 761 |
|  | IG1/G | 82 | **43** | 24 |
|  | IG4/G | 127 | **77** | 57 |
|  | IG16/G | 321 | **260** | 189 |
|  | IG32/G | 105 | **71** | 50 |
|  | IG64/G | 462 | **404** | 336 |
|  |  |  |  |  |
| CS | Time course | 1257 | **1103** | 954 |
|  | CS1/S | 225 | **155** | 93 |
|  | CS4/S | 374 | **244** | 165 |
|  | CS16/S | 524 | **432** | 368 |
|  | CS32/S | 788 | **706** | 629 |
|  | CS64/S | 446 | **387** | 334 |
