# Supplementary material for: CSP and Takeout Genes Modulate the Switch between Attraction and Repulsion during Behavioral Phase Change in the Migratory Locust
Source: PLOS journal article supplement (doi:10.1371/journal.pgen.1001291), 2011-02-03
Supplement: S18 (10.1371/journal.pgen.1001291.s018) [file journal.pgen.1001291.s018]

| Table S2. Top ten regulated pathways during the time course of IG or CS | | | | | |
| --- | --- | --- | --- | --- | --- |
| Time course | KEGG pathways | No. of differentially expressed genes in locust | No. of fruit fly genes located in various pathways | P value | Pathway ID |
| IG | Glycine, serine and threonine metabolism | 8 | 20 | 8.41E-06 | ko00260 |
|  | Aminosugars metabolism | 8 | 24 | 2.49E-05 | ko00530 |
|  | Pyruvate metabolism | 6 | 27 | 1.67E-03 | ko00620 |
|  | Polyunsaturated fatty acid biosynthesis | 3 | 6 | 4.43E-03 | ko01040 |
|  | Tyrosine metabolism | 6 | 35 | 5.23E-03 | ko00350 |
|  | Fructose and mannose metabolism | 5 | 24 | 5.24E-03 | ko00051 |
|  | Pentose and glucuronate interconversions | 5 | 24 | 5.24E-03 | ko00040 |
|  | Metabolism of xenobiotics by cytochrome P450 | 7 | 48 | 5.75E-03 | ko00980 |
|  | Chaperones and folding catalysts | 9 | 80 | 8.44E-03 | ko03110 |
|  | Carbon fixation | 4 | 20 | 1.41E-02 | ko00710 |
|  |  |  |  |  |  |
| CS | Chaperones and folding catalysts | 22 | 80 | 1.74E-08 | ko03110 |
|  | Glycine, serine and threonine metabolism | 11 | 20 | 3.95E-06 | ko00260 |
|  | Methionine metabolism | 8 | 13 | 4.85E-05 | ko00271 |
|  | PPAR signaling pathway | 9 | 20 | 1.04E-04 | ko03320 |
|  | Lysine degradation | 10 | 30 | 3.16E-04 | ko00310 |
|  | Metabolism of xenobiotics by cytochrome P450 | 12 | 48 | 7.43E-04 | ko00980 |
|  | Tyrosine metabolism | 9 | 35 | 2.91E-03 | ko00350 |
|  | Selenoamino acid metabolism | 6 | 16 | 3.26E-03 | ko00450 |
|  | Starch and sucrose metabolism | 11 | 51 | 3.38E-03 | ko00500 |
|  | Polyunsaturated fatty acid biosynthesis | 4 | 6 | 3.58E-03 | ko01040 |
